# Supplementary material for: Enhancing oxygen permeation through hierarchically-structured perovskite membranes elaborated by freeze-casting
Source: Royal Society of Chemistry journal article supplement (doi:10.1039/c3ta14069e), 2013-12-17
Supplement: c3ta14069e.pdf [file c3ta14069e.pdf]

## **Supporting information**

### **Table of contents**

- 1) Microscopic study of the asymmetric membrane
- 2) Gas permeation study of the porous support
- 3) Additional O<sub>2</sub> permeation results
- 4) Stability test in CO<sub>2</sub>

## 1) Microscopic study of the asymmetric membranes

A microscopic study of the asymmetric membrane developed by freeze-casting and screen printing and developed by Jülich has been realized to get information about the microstructure and the organisation of the porosity. The Scanning electron Microscopic used is a Jeol Model JSM-5410.

### a) Freeze-cast membrane

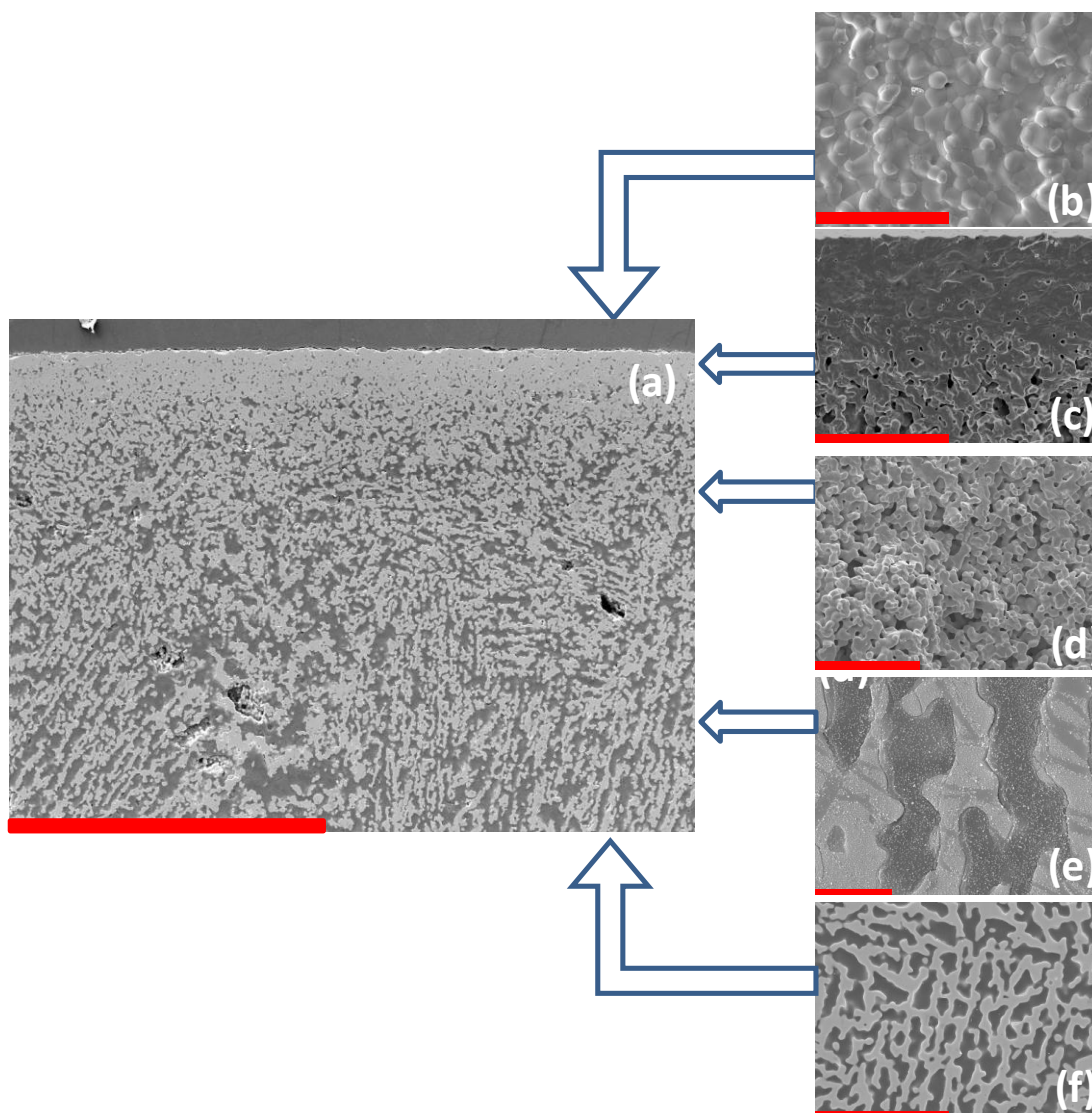

**Figure S1.** Microscopic study of the asymmetric membrane. (a) Asymmetric membrane: Porous support + dense top-layer, scale bar 400  $\mu\text{m}$ ; (b) surface of the dense top layer, scale bar 30  $\mu\text{m}$ ; (c) cross-section of the dense top-layer, scale bar 80  $\mu\text{m}$ ; (d) cross section of the non-oriented random porosity, scale bar 50  $\mu\text{m}$ ; (e) cross section of the hierarchically-oriented porosity, scale bar 10  $\mu\text{m}$ ; (f) surface of the hierarchically-oriented porosity, bottom of the asymmetric membrane, scale bar 60  $\mu\text{m}$

**b) Asymmetric membrane developed by Jülich**

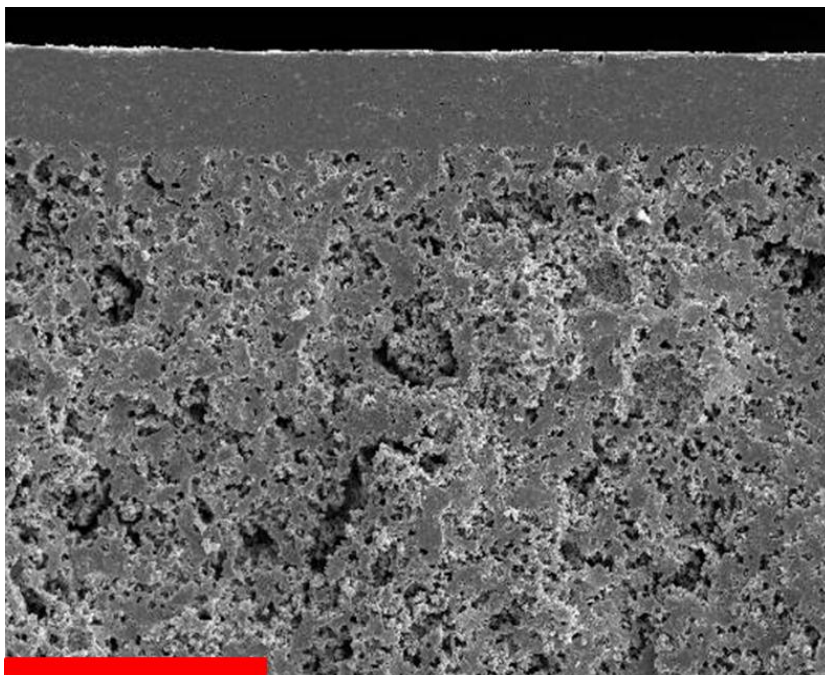

**Figure S2.** Cross section of the asymmetric membrane developed by Forschungszentrum Jülich, scale bar 100  $\mu\text{m}$

## 2) Gas permeation study of the porous support

This study is carried out using porous support without any top layer. For this purpose, the freeze-cast support was sintered without coating a top layer and subsequently the non-oriented porous volume was removed by grinding. The pressure drop of the porous support prepared by freeze-casting has been evaluated at high temperatures using the same set-up as the permeation test and using a ceramic cement to seal the outer support area to the quartz tube. Argon, helium and nitrogen were used and the pressure drop  $\Delta P$  across the membrane was recorded as a function of the inlet gas flow rate and temperature.

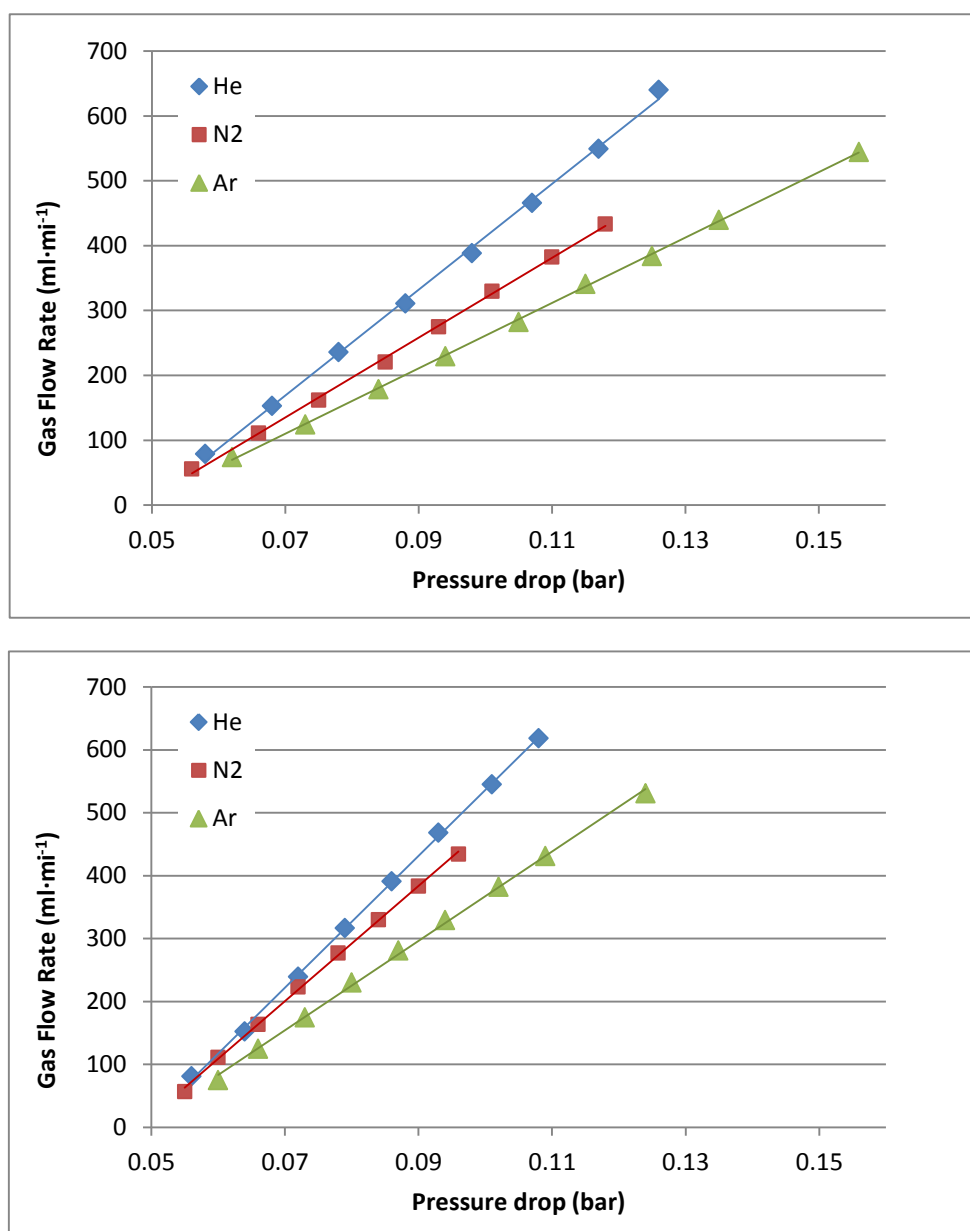

**Figure S3.**  $\Delta P$  across the porous support as a function of the gas flow rate at (top) 800 °C and 900 °C (down) for a 1.5 mm –thick tape-cast support made of LSCF.

**Table S1.** Results of the linear fit  $\Pi = a \cdot \Delta P + b$  of the Ar single gas permeance as a function of the  $\Delta P$  for the freeze-cast and tape-cast supports. \* Note: determined at  $Q_{Ar} = 250 \text{ ml} \cdot \text{min}^{-1}$

| Temperature | a factor                                                                      | b factor                                                                      | $\Pi_v / \Pi_k$ * | a factor                                                                      | b factor                                                                      | $\Pi_v / \Pi_k$ * |
|-------------|-------------------------------------------------------------------------------|-------------------------------------------------------------------------------|-------------------|-------------------------------------------------------------------------------|-------------------------------------------------------------------------------|-------------------|
| (°C)        | ( $\text{mol} \cdot \text{Pa}^{-2} \cdot \text{s}^{-1} \cdot \text{m}^{-2}$ ) | ( $\text{mol} \cdot \text{Pa}^{-1} \cdot \text{s}^{-1} \cdot \text{m}^{-2}$ ) | %                 | ( $\text{mol} \cdot \text{Pa}^{-2} \cdot \text{s}^{-1} \cdot \text{m}^{-2}$ ) | ( $\text{mol} \cdot \text{Pa}^{-1} \cdot \text{s}^{-1} \cdot \text{m}^{-2}$ ) | %                 |
|             | freeze-cast                                                                   | freeze-cast                                                                   | freeze-cast       | tape-cast                                                                     | tape-cast                                                                     | tape-cast         |
| 600         | $1,8 \cdot 10^{-9}$                                                           | $8,8 \cdot 10^{-4}$                                                           | 2%                | $3,0 \cdot 10^{-10}$                                                          | $1,0 \cdot 10^{-4}$                                                           | 10%               |
| 700         | $2,0 \cdot 10^{-9}$                                                           | $9,2 \cdot 10^{-4}$                                                           | 2%                | $3,7 \cdot 10^{-10}$                                                          | $1,2 \cdot 10^{-4}$                                                           | 12%               |
| 800         | $9,6 \cdot 10^{-9}$                                                           | 0,010                                                                         | 6%                | $5,0 \cdot 10^{-10}$                                                          | $1,5 \cdot 10^{-4}$                                                           | 13%               |
| 900         | $1,5 \cdot 10^{-8}$                                                           | 0,016                                                                         | 4%                | nd                                                                            | nd                                                                            | Nd                |

The argon permeance can be written by the following equation:

$$\Pi = a \cdot \Delta P + b$$

Where a and b are the viscous flow (*Poiseuille*)  $\Pi_v$  and the *Knudsen* flow  $\Pi_k$  contributions, respectively <sup>1</sup>. The fitting of the four permeance measurements are summarized in the Table S1 for both porous supports, where both a and b factors are given. Irrespective of the temperature, the *Knudsen* flow appears to be the most important mechanism in the gas.

Argon, helium and nitrogen were used as gas to measure the pressure drop  $\Delta P$  across the membrane as a function of the inlet flow. As a comparison, the same experiment was performed with the support of the asymmetric membrane prepared by tape-casting

<sup>1</sup> R.J.R. Uhlhorn, K. Keizer, A. J. Burgraaf, J. Memb. Sci. 46 (1995) 2131

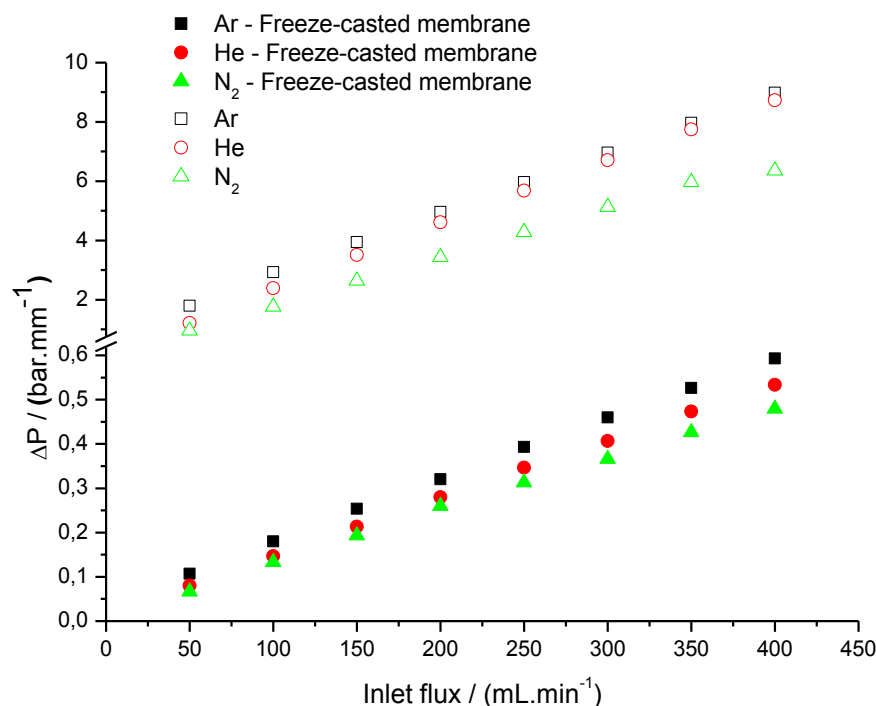

**Figure S4.** Normalized pressure drop  $\Delta P$  across two porous support (filled symbol: support elaborated by freeze-casting, empty symbol: support of the asymmetric membrane developed by tape-casting) as a function of the inlet flux and for three different gases at 800°C

Figure S4 represents the normalized  $\Delta P$  across the porous support elaborated by freeze-casting and across the support of the asymmetric membrane developed by Jülich as a function of the inlet flux and at 800°C. Whatever the gas and the inlet flux, the porous support elaborated by freeze-casting presents a lower pressure drop than the other support. For example, when N<sub>2</sub> is chosen as gas, the pressure drop of the freeze-cast support does not exceed 0.48 bar.mm<sup>-1</sup> for an inlet flow of 400mL.min<sup>-1</sup> while it already reaches 0.89 bar.mm<sup>-1</sup> for an inlet flow of only 50 mL.min<sup>-1</sup> with the other support.

### 3) Additional O<sub>2</sub> permeation results

Figure S5 presents the evolution of the permeation flux as a function of temperature and the oxygen partial pressure of the gas feed. The partial pressure was achieved by using different mixtures of N<sub>2</sub> and O<sub>2</sub>. A very important improvement in the flux is achieved at both high and low operating temperatures. Indeed, at 1000 °C a peak flux of ~18 ml·min<sup>-1</sup>·cm<sup>-2</sup> is observed when using pure O<sub>2</sub>. On the other hand, a relatively higher improvement is achieved at 600 °C, reaching a flux of ~2 ml·min<sup>-1</sup>·cm<sup>-2</sup> when using 75% O<sub>2</sub> in the feed. Moreover, the strong changes in the apparent activation energies are in full agreement with previous observations using the tape-cast LSCF membrane<sup>33</sup> and are related to the progressive change of the rate limiting steps as a function of the

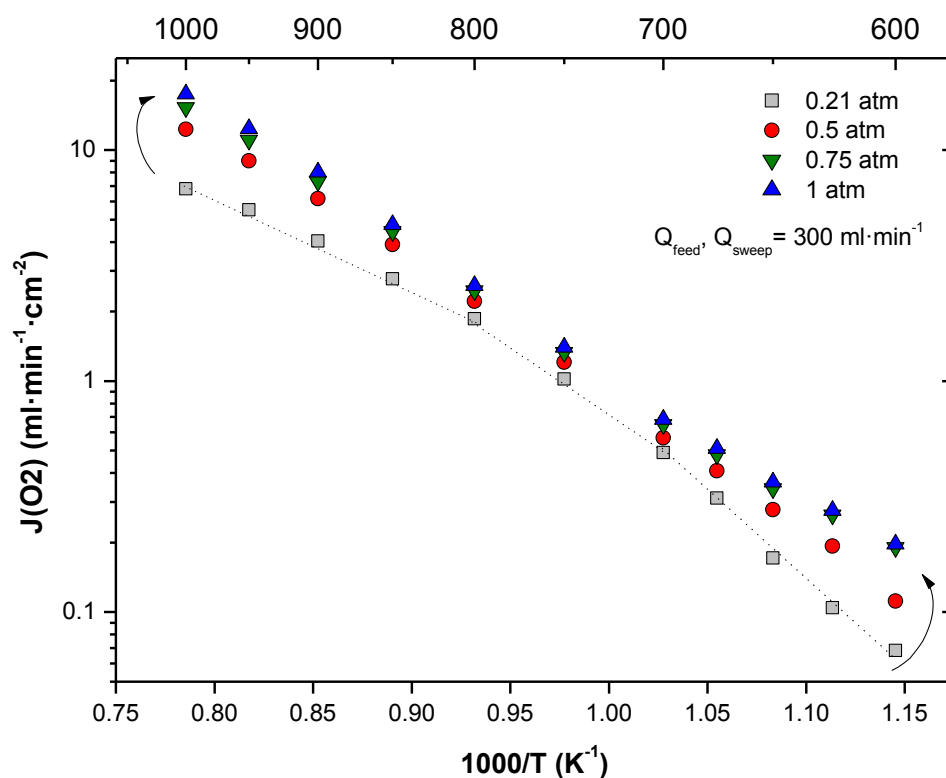

oxygen partial pressure (and temperature).

**Figure S5.** Thermal evolution of the oxygen flux as a function of the oxygen partial pressure in the feed gas, made of mixture of O<sub>2</sub> and N<sub>2</sub>. The total feed pressure was slightly above the atmospheric.

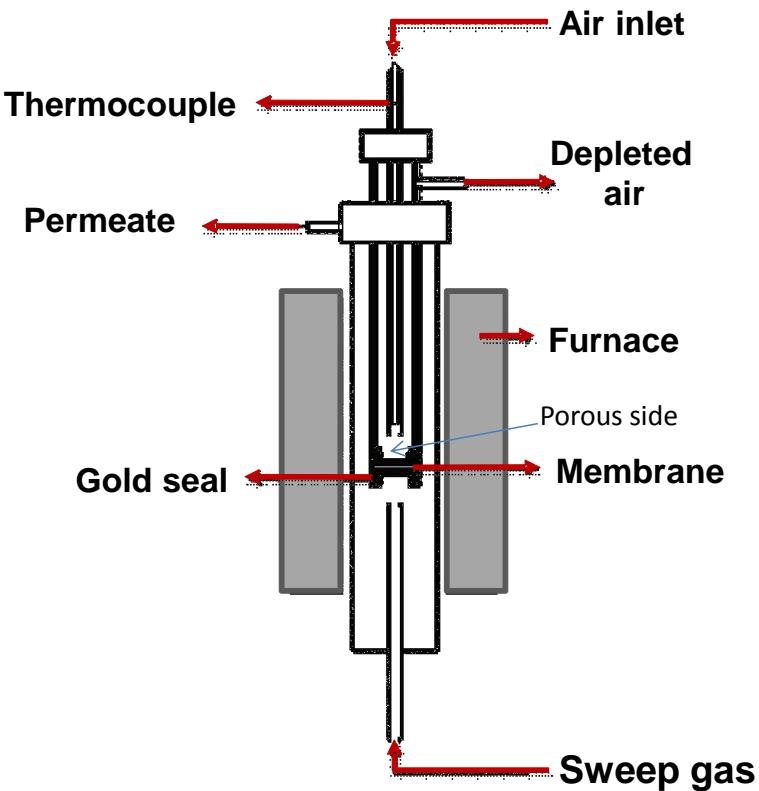

**Figure S6.** Experimental setup of oxygen permeation test.

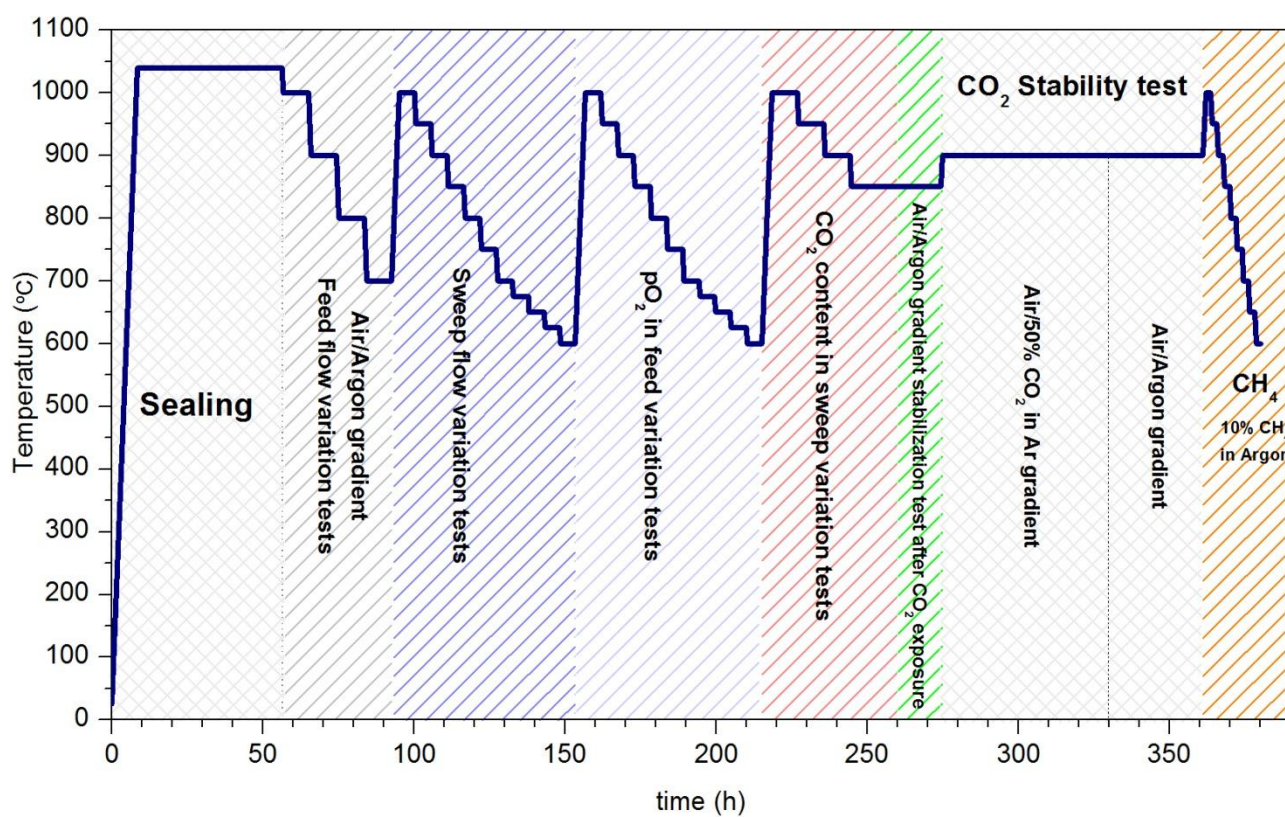

**Figure S7.** Thermal cycling (experimental permeation test) for the bare LSCF asymmetric tape-cast sample

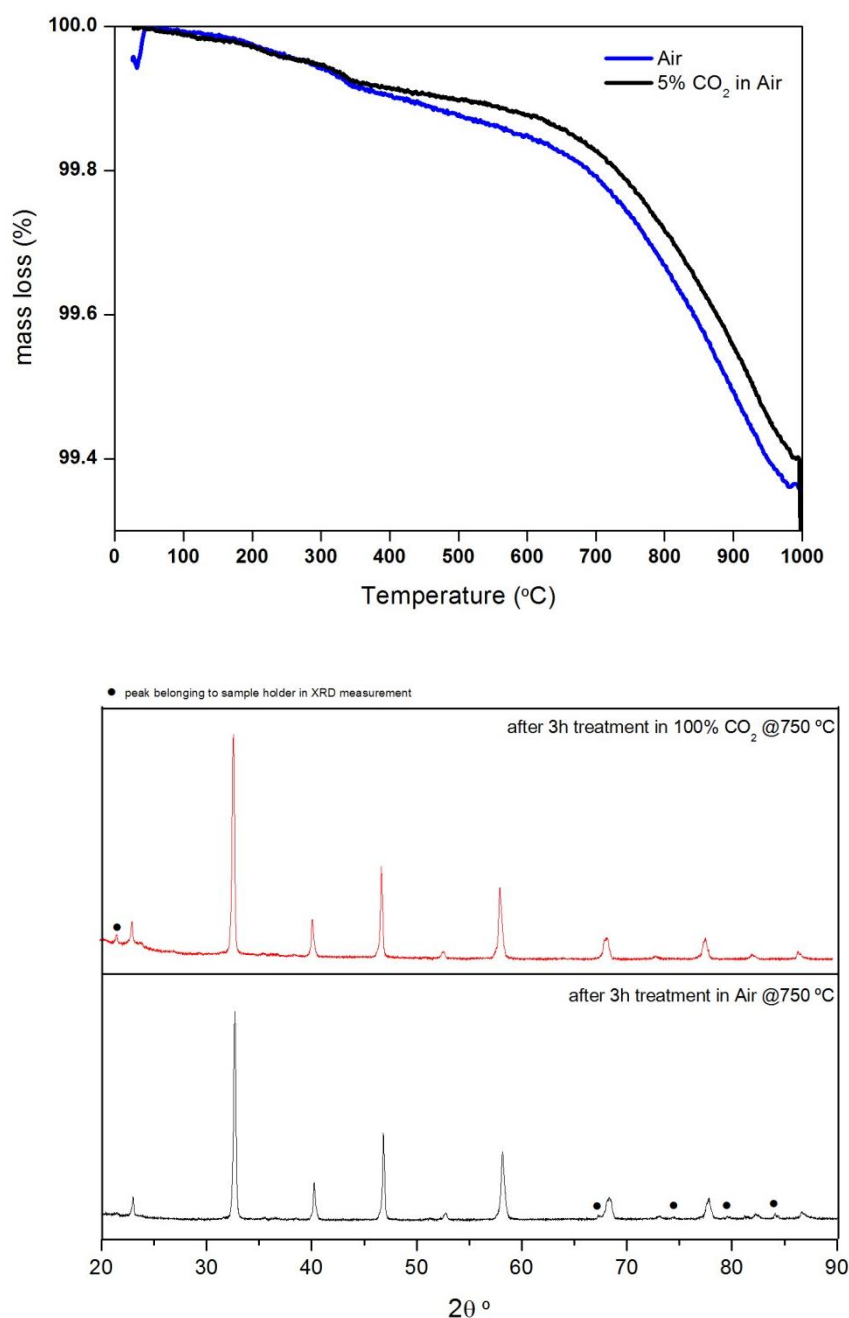

**Figure S8.** (top) Thermogravimetric analysis of LSCF power in air and air with 5% CO<sub>2</sub> and (bottom) XRD patterns of LSCF samples quenched directly from 750°C in Air or pure CO<sub>2</sub> gas environment

Experimental: Thermogravimetry analysis was performed on a Mettler-Toledo StarE equipment in air with 5% CO<sub>2</sub> and using a heating ramp of 10 K/min. XRD measurements were carried out by a PANalytical X'Pert PRO diffractometer, using CuKα<sub>1,2</sub> radiation and an X'Celerator detector in Bragg-Brentano geometry. XRD patterns were recorded in the 2θ range from 20° to 90° and analyzed using X'Pert Highscore Plus software
